# Supplementary material
Source: PubMed Central journal article supplement (PMC5241171)
Supplement: NIHMS807900-supplement-1.pdf [file NIHMS807900-supplement-1.pdf]

### **NMR measurement: Sample preparation and analysis**

For studies on extracellular media, 5TGM1, OPM2 and U266 cells were incubated in the presence of 0.005-0.01 M  $1\text{-}^{13}\text{C}$  or  $2\text{-}^{13}\text{C}$  Acetate in standard growth at a concentration of  $10^6$  cells/mL (-/+0.35). Supernatants were collected at the indicated time-points by centrifugation and snap-frozen in liquid nitrogen. 1 mL cell growth media was frozen with dry ice then lyophilized by Speed Vac Concentrator (Savant®). The lyophilized samples were saved at  $-80\text{ }^\circ\text{C}$  until use. Samples were re-suspended into 0.56 mL  $\text{D}_2\text{O}$  with 1 mM t-butanol as an internal standard. The sample pH was adjusted to 7.0 and then loaded into 5 mm tubes for NMR analysis. Cell extraction was performed as previously described (1) (2). Briefly, cells were extracted with 0.5 mL  $-20\text{ }^\circ\text{C}$  50% methanol/water incubation for 20 min on dry ice, sonicated for 1-2 minutes with 30 off/on cycles (50% duty cycle) in an ice bath. 0.5 mL chloroform was added and centrifuged at  $4\text{ }^\circ\text{C}$ , 13000-15000 rpm for 10 min. Both aqueous and chloroform layers were collected and dried for NMR analysis. The metabolites from aqueous layer were re-suspended into 0.3 mL  $\text{D}_2\text{O}$  with 1 mM t-butanol internal standard and charged into a susceptibility-matched Shigemi tube. The metabolites from chloroform (membrane extraction) were re-suspended in 0.6 mL deuterated chloroform.

The NMR measurements were carried out at  $25\text{ }^\circ\text{C}$  using a DD-II 11.75 tesla spectrometer (Agilent/Varian) equipped with a reverse-detection probe. Two measurements were carried out on all samples. The first was a 16-transient CPMG (Car-Purcell-Meiboom-Gill) with water pre-saturation and  $^{13}\text{C}$  decoupling (where proton doublets bounded to  $^{13}\text{C}$  are collapsed to singlets at a chemical shift identical to protons bound to  $^{12}\text{C}$ ) under quantitative equilibrium conditions. The CPMG method was chosen to rid signals from macromolecules through appropriate choice of a  $T_2$  filter. Collection conditions include a spectral window of 6983 Hz,  $^1\text{H}$   $90^\circ$  pulse width of 6.9-8.4  $\mu\text{s}$  (pending salt), 1 s acquisition time, 14K complex data points., 18 s pre acquisition delay and 4

dummy scan). Spectra were commonly processed with an exponential apodization function corresponding to 1 Hz line-broadening factor and zero-filling to 64K. Substrate and metabolite concentrations were determined from the CPMG data through prior calibration relative to 1 mM t-butanol established by equilibrium pulse and collect conditions. The second NMR measurement is a first-increment gHSQC experiment to effectively measure only the  $^{13}\text{C}$ -enrichment of substrate and metabolites. This acquisition is collected for 128 transient under quantitative equilibrium conditions similar to the CPMG, with  $^{13}\text{C}$  a  $90^\circ$  pulse width of 12  $\mu\text{s}$ . The FID values were multiplied by a gaussian adapodization function with a 0.1 s time constant. The relative amplitude of substrates or metabolites was calculated with Agilent CRAFT (Complete Reduction to Amplitude-Frequency Table) software installed in VnmrJ4.2.

For the  $^1\text{H}$ - $^{13}\text{C}$  gHSQC 2D experiment measurement on lipid layer from cell extractions, the acquisition is collected for 16 transient in  $t_2$  with 160 increments in the second dimension ( $t_1$ ) and 4 dummy scans. The  $^1\text{H}$   $90^\circ$  pulse width is 6.5  $\mu\text{s}$ ; the  $^{13}\text{C}$   $90^\circ$  pulse width is 12  $\mu\text{s}$ . The spectral width is 8012 hz for  $^1\text{H}$  and 31250 hz for  $^{13}\text{C}$ . The FID was manipulated via an apodization function consisting of a negative exponential and 0.05 hz Gaussian function. The spectra are processed with VnmrJ 4.2A software.

## REFERENCES

1. Beckonert O, Keun HC, Ebbels TM, Bundy J, Holmes E, Lindon JC, et al. Metabolic profiling, metabolomic and metabonomic procedures for NMR spectroscopy of urine, plasma, serum and tissue extracts. *Nature protocols*. 2007;2:2692-703.
2. Matheus N, Hansen S, Rozet E, Peixoto P, Maquoi E, Lambert V, et al. An easy, convenient cell and tissue extraction protocol for nuclear magnetic resonance metabolomics. *Phytochemical analysis : PCA*. 2014;25:342-9.
